# Supplementary material
Source: PubMed Central journal article supplement (PMC9124441)
Supplement: NIHMS1803778-supplement-1.pdf [file NIHMS1803778-supplement-1.pdf]

Table S1. *Correlations among outcome variables at baseline.*

|                                            | <b>PTSD</b> | <b>Insomnia</b> | <b>Sleep Quality</b> | <b>Diary SE</b> | <b>Diary TST</b> | <b>Objective SE</b> | <b>Nightmares per Week</b> | <b>Depression</b> | <b>Anxiety</b> | <b>Mental QoL</b> | <b>Physical QoL</b> |
|--------------------------------------------|-------------|-----------------|----------------------|-----------------|------------------|---------------------|----------------------------|-------------------|----------------|-------------------|---------------------|
| <b>PTSD</b><br>(PCL-5 Total Score)         | 1.00        |                 |                      |                 |                  |                     |                            |                   |                |                   |                     |
| <b>Insomnia</b><br>(ISI Total Score)       | 0.52***     | 1.00            |                      |                 |                  |                     |                            |                   |                |                   |                     |
| <b>Sleep Quality</b><br>(PSQI Total Score) | 0.40***     | 0.68***         | 1.00                 |                 |                  |                     |                            |                   |                |                   |                     |
| <b>Diary SE</b><br>(%)                     | -0.32***    | -0.41***        | -0.53***             | 1.00            |                  |                     |                            |                   |                |                   |                     |
| <b>Diary TST</b><br>(Minutes)              | -0.11       | -0.22           | -0.27*               | 0.69***         | 1.00             |                     |                            |                   |                |                   |                     |
| <b>Objective SE</b><br>(%)                 | -0.11       | -0.46***        | -0.45***             | 0.34**          | 0.25*            | 1.00                |                            |                   |                |                   |                     |
| <b>Nightmares Per Week</b>                 | 0.55***     | 0.41***         | 0.38***              | -0.45***        | -0.29*           | -0.20               | 1.00                       |                   |                |                   |                     |
| <b>Depression</b><br>(PHQ-9 Total Score)   | 0.67***     | 0.51***         | 0.36**               | -0.37**         | -0.28*           | -0.14               | 0.43***                    | 1.00              |                |                   |                     |
| <b>Anxiety</b><br>(GAD-7 Total Score)      | 0.58***     | 0.54***         | 0.34**               | -0.24*          | -0.18            | -0.26*              | 0.28*                      | 0.67***           | 1.00           |                   |                     |
| <b>Mental QoL</b><br>(SF-12 Mental)        | -0.45***    | -0.32**         | -0.18                | 0.18            | -0.005           | 0.16                | -0.23                      | -0.54***          | -0.42***       | 1.00              |                     |
| <b>Physical QoL</b><br>(SF-12 Physical)    | -0.16       | -0.29*          | -0.34**              | 0.23            | 0.11             | 0.20                | -0.11                      | -0.25*            | -0.17          | -0.20             | 1.00                |

*Note: \*p≤0.05, \*\*p≤0.01, \*\*\*p≤0.001; SE=sleep efficiency; TST=total sleep time*

Table S2. *Outcome variable means at post-treatment and 3-month follow-up.*

|                                              | Post-Treatment<br>M (SD) |                       | 3-Month Follow-Up<br>M (SD) |                       |
|----------------------------------------------|--------------------------|-----------------------|-----------------------------|-----------------------|
|                                              | Without Probable<br>PTSD | With Probable<br>PTSD | Without Probable<br>PTSD    | With Probable<br>PTSD |
| <b>Insomnia</b><br>(ISI Total Score)         | 4.24 (3.94)              | 6.8 (5.96)            | 5.78 (5.72)                 | 8.59 (5.75)           |
| <b>Sleep Quality</b><br>(PSQI Total Score)   | 4.20 (2.99)              | 6.20 (3.93)           | 5.53 (3.95)                 | 7.74 (5.26)           |
| <b>Diary Sleep Efficiency</b><br>(%)         | 91.91 (8.69)             | 89.83 (7.87)          | 90.38 (7.58)                | 88.02 (8.16)          |
| <b>Diary TST</b><br>(Minutes)                | 398.81 (64.53)           | 385.90 (72.93)        | 403.25 (63.22)              | 415.06 (65.06)        |
| <b>Objective Sleep<br/>Efficiency</b><br>(%) | 83.77 (6.47)             | 82.28 (6.30)          | 81.86 (7.63)                | 81.54 (4.45)          |
| <b>Nightmares Per Week</b>                   | 0.57 (1.33)              | 1.33 (1.84)           | 0.44 (0.79)                 | 1.37 (1.76)           |
| <b>Depression</b><br>(PHQ-9 Total Score)     | 2.62 (2.90)              | 7.30 (5.60)           | 3.38 (3.88)                 | 8.56 (5.60)           |
| <b>Anxiety</b><br>(GAD-7 Total Score)        | 2.43 (2.68)              | 8.13 (6.13)           | 3.82 (3.95)                 | 9.67 (6.43)           |
| <b>Mental QoL</b><br>(SF-12 Mental)          | 53.19 (7.82)             | 42.38 (13.69)         | 50.31 (12.04)               | 42.13 (10.26)         |
| <b>Physical QoL</b><br>(SF-12 Physical)      | 47.23 (12.38)            | 39.64 (13.81)         | 47.30 (12.11)               | 40.64 (13.89)         |

Table S3. *Power analysis of the results shown in Table 3.*

| Outcome                                 | Effect Size  | Power to Detect Effect                     |                                               |
|-----------------------------------------|--------------|--------------------------------------------|-----------------------------------------------|
|                                         | For $d=0.50$ | Baseline vs. Post-Treatment by PTSD Status | Baseline vs. 3-Month Follow-up by PTSD Status |
| <b>Insomnia</b> (ISI Total Score)       | 3.44         | 0.80                                       | 0.55                                          |
| <b>Sleep Quality</b> (PSQI Total Score) | 2.37         | 0.67                                       | 0.55                                          |
| <b>Diary Sleep Efficiency</b> (%)       | 5.92         | 0.56                                       | 0.53                                          |
| <b>Diary TST</b> (Min)                  | 36.61        | 0.68                                       | 0.60                                          |
| <b>Objective Sleep Efficiency</b> (%)   | 3.36         | 0.60                                       | 0.50                                          |
| <b>Nightmares Per Week</b>              | 1.15         | 0.57                                       | 0.46                                          |
| <b>Depression</b> (PHQ-9 Total Score)   | 2.85         | 0.67                                       | 0.66                                          |
| <b>Anxiety</b> (GAD-7 Total Score)      | 2.98         | 0.62                                       | 0.54                                          |
| <b>Mental QoL</b> (SF-12 Mental)        | 6.00         | 0.64                                       | 0.68                                          |
| <b>Physical QoL</b> (SF-12 Physical)    | 6.57         | 0.86                                       | 0.82                                          |

*Note: Observed type 1 error rates for all tests at  $\alpha=0.05$  ranged from 0.037 to 0.073; table shows the power to detect PTSD status by time partial interaction regarding the test of 1) baseline versus post-treatment by PTSD status and 2) baseline versus 3-month follow-up by PTSD status. Results show the power to detect a medium-sized effect (Cohen's  $d=0.50$ ;  $\alpha=0.05$ ).*
